# Supplementary material for: Senolytic Combination Treatment Is More Potent Than Single Drugs in Reducing Inflammatory and Senescence Burden in Cells from Painful Degenerating IVDs
Source: MDPI journal article supplement (doi:10.3390/biom13081257), 2023-08-16
Supplement: s1 [file s1]

**Table 1** - Characteristics of the Painful Degenerate Donors Utilized in the Study (-). (ICC): Immunocytochemistry of monolayer culture including p16<sup>INK4a</sup>, Ki-67 and Caspase-3. Immunofluorescence of pellet culture for p16<sup>INK4a</sup>, Ki-67 and Caspase-3. (RT-qPCR): Real-time Quantitative Polymerase Chain Reaction, (ELISA): Enzyme-linked immunosorbent assays, (DMMB): Dimethyl methylene blue (DMMB) assays.

| Donor | Age | Sex | ICC | IHC | RT-qPCR | ELISA | DMMB |
|-------|-----|-----|-----|-----|---------|-------|------|
| 1     | 32  | M   | -   |     | -       | -     |      |
| 2     | 65  | F   | -   |     | -       | -     |      |
| 3     | 66  | M   | -   |     | -       | -     |      |
| 4     | 47  | F   | -   |     | -       | -     |      |
| 5     | 61  | F   | -   | -   | -       | -     | -    |
| 6     | 55  | F   | -   | -   | -       | -     | -    |
| 7     | 45  | M   | -   | -   | -       | -     | -    |
| 8     | 35  | F   |     | -   | -       | -     | -    |
| 9     | 67  | M   |     | -   | -       | -     | -    |
| 10    | 43  | M   |     | -   | -       | -     | -    |
| 11    | 56  | M   |     | -   | -       | -     | -    |

**Table 2 - qRT-PCR Primer Sequences**

| <b>Target</b>  | <b>Forward Primer Sequence</b> | <b>Reverse Primer Sequence</b>   | <b>Reference</b>                        |
|----------------|--------------------------------|----------------------------------|-----------------------------------------|
| BDNF           | 5'-TAACGGCGGCAGACAAAAAGA-3'    | 5'-GAAGTATTGCTTCAGTTGGCCT-3'     | Krock et al., 2017                      |
| CCL2           | 5'-GCATGAAAGTCTCTGCCG-3'       | 5'-GAGTGTTCAAGTCTTCGGA-3'        | Sandell et al. 2008                     |
| CCL5           | 5'-GAAGGTCTCCGCGGCAGCC-3'      | 5'-CTGGGCCCTTCAAGGAGCGG-3'       | Sandell et al. 2008                     |
| CCL7           | 5'-CACTTCTGTGTCTGCTGCTCAC-3'   | 5'-GTTTTCTTGTCCAGGTGCTTCATA-3'   | Wang et al. 2011                        |
| CCL8           | 5'-GCCTGCTGCTCATGGCAGCC-3'     | 5'-GCACAGACCTCCTTGCCCCG-3'       | Sandell et al. 2008                     |
| CXCL10         | 5'-GTGGCATTCAAGGAGTACCTC-3'    | 5'-TGATGGCCTTCGATTCTGGATT-3'     | Sandell et al. 2008                     |
| CXCL8/<br>IL-8 | 5'-TCCTGATTTCTGCAGCTCTG-3'     | 5'-GTCTTTATGCACTGACATCTAAGTTC-3' | Cherif et al. 2019                      |
| G-CSF          | 5'-GAGCAAGTGAGGAAGATCCAG-3'    | 5'-CAGCTTGTAGGTGGCACACTC-3'      | Ullah et al. 2015                       |
| GAPDH          | 5'-TCCCTGAGCTGAACGGGAAG-3'     | 5'-GGAGGAGTGGGTGTCGCTGT-3'       | Krock et al., 2017 & Cherif et al. 2019 |
| GM-CSF         | 5'-TCTCAGAAATGTTTGACCTCCA-3'   | 5'-GCCCTTGAGCTTGGTGAG-3'         | Ullah et al. 2015                       |
| GRO/<br>CXCL1  | 5'-TGAAGGCAGGGGAATGTATGTG-3'   | 5'-AGCCCCTTTGTTCTAAGCCA-3'       | Bayo et al. 2017                        |
| IFN- $\gamma$  | 5'-AACTACTGATTTCAACTTCTC-3'    | 5'-ATTACTGGGATGCTCTT-3'          | Huibers et al. 2011                     |
| IL-1 $\beta$   | 5'-ACAGATGAAGTGCTCCTTCCA-3'    | 5'-GTCGGAGATTTCGTAGCTGGAT-3'     | Krock et al., 2017                      |
| IL-6           | 5'-TGAACCTTCCAAAGATGGCTG-3'    | 5'-CAAACCTCCAAAAGACCAGTGATG-3'   | Cherif et al., 2019                     |
| NGF            | 5'-AAGTGCCGGGACCCAAAT-3'       | 5'-TGAGTTCCAGTGCTTTGAGTCAA-3'    | Krock et al., 2017                      |
| p16            | 5'-CTGCCCAACGCACCGAATA-3'      | 5'-GCTGCCCATCATCATGACCT-3'       | Cherif et al. 2019                      |
| p21            | 5'-GAGACTCTCAGGGTCGAAAAC-3'    | 5'-GGCGTTTGGAGTGGTAGAAA-3'       | Cherif et al. 2019                      |
| TGF- $\beta$   | 5'-TCCTGGCGATACCTCAGCAA-3'     | 5'-CTCAATTTCCCCTCCACGGC-3'       | Aref-Eshghi et al. 2015                 |
| TLR-1          | 5'-CAGTGTCTGGTACACGCATGGT-3'   | 5'-TTTCAAAAACCGTGTCTGTTAAGAGA-3' | Krock et al., 2017                      |

|               |                                  |                               |                       |
|---------------|----------------------------------|-------------------------------|-----------------------|
| TLR-2         | 5'-GGCCAGCAAATTACCTGTGTG -3'     | 5'-AGGCGGACATCCTGAACCT-3'     | Krock et al.,<br>2017 |
| TLR-4         | 5'-CAGAGTTTCCTGCAATGGATCA-3'     | 5'-GCTTATCTGAAGGTGTTGCACAT-3' | Krock et al.,<br>2017 |
| TLR-6         | 5'-GAAGAAGAACAACCCTTTAGGATAGC-3' | 5'-AGGCAAACAAAATGGAAGCTT-3'   | Krock et al.,<br>2017 |
| TNF- $\alpha$ | 5'-ATGTTGTAGCAAACCCTCAAGC-3'     | 5'-TCTCTCAGCTCCACGCCATT-3'    | Zhai et al.<br>2019   |
| NF-L          | 5'-AGACATCAGCGCCATGCA-3'         | 5'-TTCGTGCTTCGCAGCTCAT-3'     | Chung et al.<br>2010  |
| VGF           | 5'-GCTCGAATGTCCGAAAACGT-3'       | 5'-ACACTCCTTCCCCGAACTGA-3',   | Chung et al.<br>2010  |
| PVR           | 5'- ATGAGTGTCAGATTGCCACGTT-3'    | 5'- TCGGGCGAACACCTTCAG-3'     | Chung et al.<br>2010  |
| Plaur         | 5'- GGCTGGACCCAGGAACTTTT-3'      | 5'- CGCCTGTCCTCAAAGATGGA-3'   | Chung et al.<br>2010  |
| Plk2          | 5'- GCCCCACACCACCATCA-3'         | 5'-GGTCGACTATAATCCGCGAGAT-3'  | Chung et al.<br>2010  |
